# Supplementary material for: Impact of BRAF Mutation Class on Disease Characteristics and Clinical Outcomes in BRAF-mutant Lung Cancer
Source: Oxford University Press journal article supplement (doi:10.1158/1078-0432.ccr-18-2062), 2018-09-17
Supplement: 10780432ccr182062-sup-204419_2_supp_5003885_ptdtt8.docx [file 10780432ccr182062-sup-204419_2_supp_5003885_ptdtt8.docx]

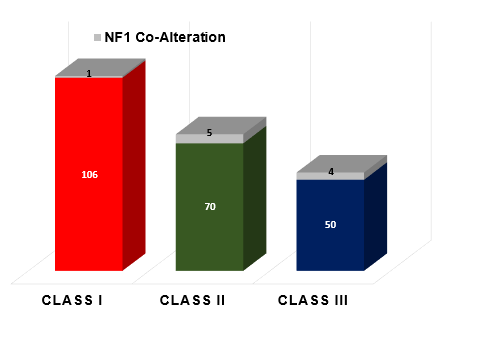


**Supplementary Figure 1. Overlap between BRAF and NF1 Genetic Alterations.** The stacked bar graphs depict the frequency of *NF1* co-alterations in each functional class. The number of tumors with and without *NF1* mutation in each functional class is indicated by the numbers on the bar graphs. Grey=NF1 co-alteration, Red= class I, Green= class II, Blue= class III.
